# Supplementary material
Source: PubMed Central journal article supplement (PMC3920663)
Supplement: NIHMS544269-supplement-Methods_and_Materials.pdf [file NIHMS544269-supplement-Methods_and_Materials.pdf]

## Materials and Methods

### Genetic Reduction of VEGFR2 Rescues Aberrant Angiogenesis Caused by Epsins Deficiency

Kandice L. Tessneer,<sup>1\*</sup> Satish Pasula,<sup>1\*</sup> Xiaofeng Cai,<sup>1</sup> Yunzhou Dong,<sup>1</sup> John McManus,<sup>1</sup> Xiaolei Liu,<sup>1,2</sup> Lili Yu,<sup>1</sup> Scott Hahn,<sup>1</sup> Baojun Chang,<sup>1</sup> Yiyuan Chen,<sup>1</sup> Courtney Griffin,<sup>1,3</sup> Lijun Xia,<sup>1,2</sup> Ralf H. Adams<sup>4</sup> and Hong Chen<sup>1,2</sup>

<sup>1</sup> Cardiovascular Biology Program, Oklahoma Medical Research Foundation, Oklahoma City, OK 73104, USA

<sup>2</sup> Biochemistry and Molecular Biology Department, University of Oklahoma Health Sciences Center, Oklahoma City, Oklahoma 73104, USA

<sup>3</sup> Cell Biology Department, University of Oklahoma Health Sciences Center, Oklahoma City, Oklahoma 73104, USA

<sup>4</sup> Max Planck Institute for Molecular Biomedicine, Department of Tissue Morphogenesis, and University of Münster, Faculty of Medicine, Münster, Germany

\*Contributed equal authorship

Running Title: Reducing VEGFR2 Corrects Abnormal Angiogenesis

Correspondence should be addressed to:

Hong Chen

Cardiovascular Biology Research Program, MS 45

Oklahoma Medical Research Foundation

825 NE 13th Street

Oklahoma City, OK 73104

Office: 405-271-2750

Fax: 405-271-3137

[hong-chen@omrf.org](mailto:hong-chen@omrf.org)

Keywords: Epsin, VEGFR2, Angiogenesis

## Materials and Methods

### Antibodies and reagents:

Mouse anti-EEA1 and anti-GAPDH were from Santa Cruz (sc-6415; sc-166545). Rat anti-CD31 was from BD Pharmingen (550274). Rabbit anti-VEGFR2, anti-phospho-VEGFR2 (pY1175), rabbit anti-PLC $\gamma$ , rabbit anti-phospho-PLC $\gamma$ , rabbit anti-Akt, rabbit anti-phospho-Akt, mouse anti-ERK and mouse anti-phospho-ERK antibodies were from Cell Signaling Technology. Rabbit anti-epsin 1 was obtained as previously described.<sup>1,2</sup> Secondary antibodies were all obtained from Invitrogen. VEGF-A was from R&D systems (293-VE/CF). EdU was from Invitrogen (A10044). Alexa Fluor 594 Azide was from Invitrogen (C10339). BrdU and 4-hydroxytamoxifen were from Sigma (B5002; H6278). Matrigel was from BD Biosciences (354230). Basic laboratory reagents were all from Sigma.

### Generation of the constitutive EC-DKO and conditional EC-iDKO mice:

*Epn2*<sup>-/-</sup> mice were obtained as described.<sup>3</sup> Conditional *Epn1*<sup>fl/fl</sup> mice were obtained as described (Figure 1A in the online Data Supplement).<sup>4</sup> *Epn1*<sup>fl/fl</sup> mice were mated with *Epn2*<sup>-/-</sup> mice to generate *Epn1*<sup>fl/fl</sup>; *Epn2*<sup>-/-</sup> mice. Constitutive endothelial cell-specific DKO (EC-DKO) mice were obtained by crossing *Epn1*<sup>fl/fl</sup>; *Epn2*<sup>-/-</sup> mice with *Tie2-Cre* deleter mice obtained from Jackson Laboratories (8863) (Figure 1B in the online Data Supplement).<sup>5</sup> Tamoxifen-inducible endothelial cell-specific DKO mice (EC-iDKO) were obtained by crossing *Epn1*<sup>fl/fl</sup>; *Epn2*<sup>-/-</sup> mice with *iCDH5 Cre* deleter mice obtained as described (Figure 1C in the online Data Supplement).<sup>6,7</sup> To induce postnatal deletion, we administered 4-hydroxytamoxifen (150  $\mu$ g per 30 g of body weight) by i.p. injection into ten-week-old mice. Injections were performed once per day for 5-7 consecutive days, followed by a 5-7 day resting period. All mice were bred on C57BL/6J background.

### Generation of the EC-iDKO-FIK<sup>fl/+</sup> mice:

*Fik*<sup>fl/+</sup> mice were obtained from Jackson Laboratories (18977).<sup>8</sup> Tamoxifen-inducible endothelial cell-specific epsin DKO-FIK<sup>fl/+</sup> mice (EC-iDKO-FIK<sup>fl/+</sup>) were obtained by crossing *Epn1*<sup>fl/fl</sup>; *Epn2*<sup>-/-</sup> mice with the *Fik*<sup>fl/+</sup> mice generating *Epn1*<sup>fl/fl</sup>; *Epn2*<sup>-/-</sup>; *Fik*<sup>fl/+</sup> mice (Figure 1D in the online Data Supplement), then subsequently crossing with *iCDH5 deleter Cre* mice (Figure 1E in the online Data Supplement). Tamoxifen-induced deletion was done as described above. All mice were bred on C57BL/6J background.

### Generation of the Streptozotocin (STZ)-induced Diabetic mice:

Male mice, aged 2-3 months, were injected i.p. with 50 mg/kg STZ in citrate buffer, pH 4.5 for 5 consecutive days. One week post-injection, blood glucose was measured by applying tail blood to a glucometer as described previously.<sup>9</sup> Mice with blood glucose levels >300 mg/dL were considered diabetic and used for the wound healing assays.

### Primary Mouse Endothelial Cell Isolation and Culture:

Primary mouse endothelial cells (MEC) isolation from brains was performed as described previously.<sup>10</sup> Specifically, meninges of three week-old brains isolated from WT, EC-iDKO or EC-iDKO-FIK<sup>fl/+</sup> mice were carefully removed and the gray matter minced and then digested with 1 mg/mL collagenase (Gibco; 17100-017) in DMEM (Mediatech; 10-013-CM) for 1 h at 37°C. Microvessels were separated by centrifugation through 20% BSA/DMEM (1000 x g, 20 min). Microvessels from the pellet were further digested with 1 mg/mL collagenase-dispase (Roche) in DMEM for 15 min at 37°C. Microvessel MEC clusters were washed twice with DMEM before planting on 0.2% gelatin-coated plates. Cultures were maintained in DMEM supplemented with 20% FBS (Biowest; S01520HI) and 1 ng/mL bFGF (Roche). MECs were treated for 48 h at 37°C with 5  $\mu$ M of 4-hydroxytamoxifen (dissolved in ethanol) diluted culture medium followed by incubation for an additional two days without 4-hydroxytamoxifen. Freshly isolated primary MEC were used for all experiments without further passages.

### Immunohistochemistry and immunofluorescence:

Embryos, tissue samples, and ECs were processed for immunostaining as described below. All samples were imaged using an Olympus IX81 Spinning Disc Confocal Microscope and Hamamatsu Orca-R<sup>2</sup> Monochrome Digital Camera C1D600. Immunostaining was quantified using the companion Slidebook 5.0 software.<sup>4,11</sup>

**Embryo Whole Mount Staining:** Embryos were harvested at E10 and fixed overnight in cold 4% paraformaldehyde in PBS. After washing with ice-cold PBS, embryos were whole-mounted or paraffin embedded, sectioned, and processed for staining.<sup>12</sup> For blocking and permeabilization, sections were incubated in PBS containing 1% BSA, 0.5% Triton X-100 overnight at 4°C. Samples were stained with anti-CD31 overnight at 4°C. Biotinylated goat anti-rat IgG was absorbed to remove anti-murine IgG, and then streptavidin-conjugated to fluorescein isothiocyanate was used for secondary staining. Samples were mounted with Vectashield and analyzed as described above.

**E10 Hind Brain:** Embryos were harvested at E10 and fixed in cold 4% paraformaldehyde. Hindbrain was harvested and processed for immunofluorescent staining. For blocking and permeabilization, sections were incubated in PBS containing 1% BSA, 0.5% Triton X-100 overnight at 4°C. Samples were stained with anti-CD31 overnight at 4°C. After washing, donkey anti-rat Alex Fluor 488 secondary antibody was used for secondary staining. Samples were mounted and analyzed as described above.

**Embryonic Skin:** Embryos were harvested at E10 and fixed in 4% paraformaldehyde. Skin was harvested and processed for staining with anti-CD31 and donkey anti-rat Alex Fluor 488 secondary antibody as described above.

**Embryonic Intestine:** Embryos were harvested at E10 and fixed in 4% paraformaldehyde. Small intestines was harvested and processed for staining with anti-CD31 and donkey anti-rat Alex Fluor 488 secondary antibody as described above.

**In vitro EC staining:** ECs cultured on gelatin-coated coverslips were stimulated with 50 ng/mL of VEGF-A at 37°C for 0, 1, or 5 min. Cells were fixed in 4% paraformaldehyde then permeabilized and blocked in PBS containing 5% donkey serum, 3% BSA and 0.3% Triton X-100. Cells were immunostained with rabbit anti-VEGFR2, rabbit anti-phosphorylated VEGFR2, and mouse anti-EEA1 for 2 h at room temperature. Cells were washed then incubated with respective fluorescent secondary antibodies for 1 h at room temperature. Cells were mounted using PermaFluor (ThermoScientific; TA-030-FM) and analyzed as described above.

#### ***In vitro* EdU staining:**

Primary ECs were grown on gelatin-coated coverslips until they reached 50% confluence. EdU was added to the culture media at 10  $\mu$ M for 16 h.<sup>13</sup> After labeling, cells were washed with PBS, fixed in 4% paraformaldehyde and permeabilized in 0.1% Triton X-100. EdU incorporation was detected by incubating cells with 100  $\mu$ M fluorescent azide diluted in 100 mM Tris, 0.5 mM CuSO<sub>4</sub> and 50 mM ascorbic acid. Cells were counterstained with 0.2  $\mu$ g/mL DAPI then processed for imaging as described above.

#### **Scratch and network/tube formation assays:**

**Monolayer EC scratch assay.** Monolayer EC wound assays were performed as described.<sup>10</sup> ECs were cultured in 0.5% FBS/DMEM overnight and subjected to “wound injury” assay with a plastic pipette tip. Cells were then plated with fresh media supplemented with or without 50 ng/mL VEGF-A and further cultured for 12 h. Quantification of wound distance at 12 h was performed using NIH Image J software.

**EC network/tube formation.** EC network/tube formation in Matrigel was performed as described.<sup>10</sup> First, 0.2 mL matrigel was added to each well of 24-well plate and incubated at 37°C for 1 h. ECs were serum starved overnight then plated on Matrigel ( $2 \times 10^3$  cells). After 30 min, fresh medium supplemented with or without 50 ng/mL VEGF-A was added and cells were incubated for additional 16 h. Quantification of tube formation at 16 h was performed using NIH ImageJ software.

**Plasma Membrane isolation from MECs:**

Isolated and cultured MECs were stimulated with 50 ng/mL of VEGF-A at 37°C for the time indicated followed by homogenization in TES Buffer (255 mM TES, 10 mM NaF, 10 mM  $\text{Na}_4\text{P}_2\text{O}_7$ , 2 mM  $\text{Na}^3\text{VO}_4$ ) and centrifuged at 16,000 x g for 15 min. Pellets were further homogenized in TES Buffer, layered on a 1.15 M sucrose cushion, and centrifuged at 100,000 x g for 70 min. Plasma membrane interface was isolated and pelleted by centrifugation at 48,000 x g for 45 min. Plasma membrane pellets were resuspended and subjected to SDS-PAGE and immunoblot according to standard protocols.

***In vivo* BrdU staining:**

WT, EC-iDKO or EC-iDKO-Flk<sup>fl/+</sup> pups were injected i.p. with 5 mg/kg (body weight) of 4-hydroxytamoxifen (10 mg/ml of 4-hydroxytamoxifen resuspended in 20% of ethanol and 80% of DMSO) per day from postnatal day 1 (P1) to P3. Pups were euthanized at P6 after i.p. injection of BrdU (100 mg/kg body weight) for 3 hr. Small intestines were harvested. Small intestines were embedded and paraffin sections were stained with anti-CD31 and anti-BrdU antibodies (Invitrogen).

***In vivo* Wound Healing Assay:**

Under anesthesia, mice were wounded using a 4-mm-diameter full-thickness dorsal skin punch biopsy. Wounds were then photographed daily over 9 days after injury, and wound area was measured using NIH ImageJ software. The wounds were biopsied to include the margin of normal surrounding skin and snap-frozen in Tissue-Tek OCT (Sakura) and fixed in cold 4% paraformaldehyde overnight. Cryosections were processed for immunofluorescent staining as described above.

***In vivo* Matrigel Angiogenesis Assay:**

Matrigel plug assay was performed as described previously.<sup>14</sup> Briefly, mice were injected s.c. with 500  $\mu\text{L}$  of unpolymerized growth factor-reduced Matrigel mixed with either PBS or VEGF (200 ng/mL). Mice were euthanized after 5 days and the plugs removed. Plugs were photographed, formalin-fixed, paraffin embedded and processed for immunostaining with anti-CD31 as described above.

***In vivo* Tumor Xenograft Assay:**

Lewis Lung Carcinoma (LLC) cells obtained from ATCC were injected s.c. ( $1 \times 10^6$  cells/tumor) in twelve-week-old WT, EC-iDKO, or EC-iDKO-FLK<sup>fl/+</sup> mice.<sup>4</sup> Time of tumor appearance was estimated and tumor growth was monitored in three groups of mice by measuring tumor size with digital calipers. Tumors more than 2 mm in diameter were recognized as positive. Tumor volumes were calculated based on the formula:  $0.5326 (\text{length} [\text{mm}] \times \text{width} [\text{mm}]^2)$ . Tumors were harvested, photographed, paraffin embedded and processed for immunofluorescence.

**Miscellaneous Procedures:**

SDS/PAGE and immunoblotting were performed according to standard procedures.

**Study Approval:**

All animal studies were performed in compliance with institutional guidelines and were approved by Institutional Animal Care and Use Committee (IACUC), Oklahoma Medical Research Foundation, Oklahoma City, OK.

**Statistical Analysis:**

Data was shown as  $\pm$  S.E.M. Data were analyzed by the two-tailed student's t test or ANOVA, where appropriate. The Wilcoxon signed-rank test was used to compare data that did not satisfy the student's t test or ANOVA. P value  $\leq$  0.05 was considered significant.

## References

1. Chen H, Fre S, Slepnev VI, Capua MR, Takei K, Butler MH, Di Fiore PP, De Camilli P. Epsin is an eh-domain-binding protein implicated in clathrin-mediated endocytosis. *Nature*. 1998;394:793--797.
2. Rosenthal JA, Chen H, Slepnev VI, Pellegrini L, Salcini AE, Di Fiore PP, De Camilli P. The epsins define a family of proteins that interact with components of the clathrin coat and contain a new protein module. *The Journal of biological chemistry*. 1999;274:33959--33965.
3. Chen H, Ko G, Zatti A, Di Giacomo G, Liu L, Raiteri E, Perucco E, Collesi C, Min W, Zeiss C, De Camilli P, Cremona O. Embryonic arrest at midgestation and disruption of notch signaling produced by the absence of both epsin 1 and epsin 2 in mice. *Proceedings of the National Academy of Sciences of the United States of America*. 2009;106:13838--13843.
4. Pasula S, Cai X, Dong Y, et al. Endothelial epsin deficiency decreases tumor growth by enhancing vegf signaling. *The Journal of clinical investigation*. 2012;122:4424--4438.
5. Kisanuki YY, Hammer RE, Miyazaki J, Williams SC, Richardson JA, Yanagisawa M. Tie2-cre transgenic mice: A new model for endothelial cell-lineage analysis in vivo. *Developmental biology*. 2001;230:230--242.
6. Sorensen I, Adams RH, Gossler A. Dll1-mediated notch activation regulates endothelial identity in mouse fetal arteries. *Blood*. 2009;113:5680--5688.
7. Wang Y, Nakayama M, Pitulescu ME, et al. Ephrin-b2 controls vegf-induced angiogenesis and lymphangiogenesis. *Nature*. 2010;465:483--486.
8. Hooper AT, Butler JM, Nolan DJ, et al. Engraftment and reconstitution of hematopoiesis is dependent on vegfr2-mediated regeneration of sinusoidal endothelial cells. *Cell stem cell*. 2009;4:263--274.
9. Wu KK, Huan Y. Diabetic atherosclerosis mouse models. *Atherosclerosis*. 2007;191:241--249.
10. Zhang H, He Y, Dai S, Xu Z, Luo Y, Wan T, Luo D, Jones D, Tang S, Chen H, Sessa WC, Min W. Aip1 functions as an endogenous inhibitor of vegfr2-mediated signaling and inflammatory angiogenesis in mice. *The Journal of clinical investigation*. 2008;118:3904--3916.
11. Tessneer KL, Pasula S, Cai X, Dong Y, Liu X, Yu L, Hahn S, McManus J, Chen Y, Chang B, Chen H. Endocytic adaptor protein epsin is elevated in prostate cancer and required for cancer progression. *ISRN Oncology*. 2013;2013:1--8.
12. Fu J, Gerhardt H, McDaniel JM, et al. Endothelial cell o-glycan deficiency causes blood/lymphatic misconnections and consequent fatty liver disease in mice. *The Journal of clinical investigation*. 2008;118:3725--3737.
13. Salic A, Mitchison TJ. A chemical method for fast and sensitive detection of DNA synthesis in vivo. *Proceedings of the National Academy of Sciences of the United States of America*. 2008;105:2415--2420.
14. Valapala M, Thamake SI, Vishwanatha JK. A competitive hexapeptide inhibitor of annexin a2 prevents hypoxia-induced angiogenic events. *Journal of cell science*. 2011;124:1453--1464.
